# Supplementary material for: Evaluation of Heat Inactivation of Human Norovirus in Freshwater Clams Using Human Intestinal Enteroids
Source: MDPI journal article supplement (doi:10.3390/v14051014), 2022-05-10
Supplement: s1 [file s1]

## Supplementary Material

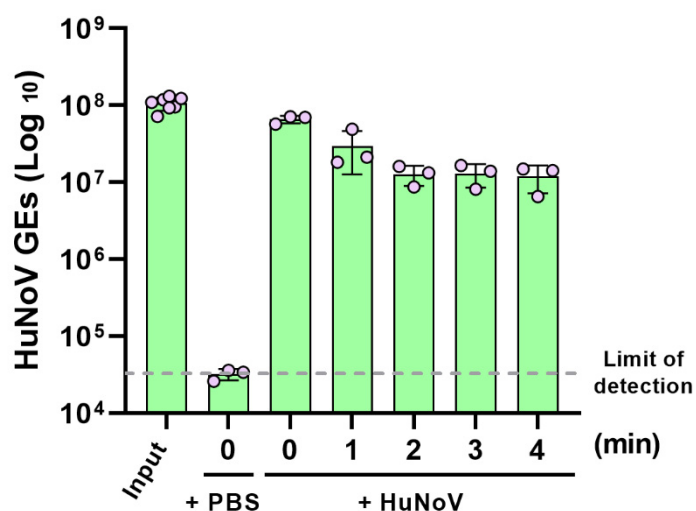

**Figure S1.** Raw data for Figure 2A; Recovery of HuNoV in freshwater clams after heat treatment.

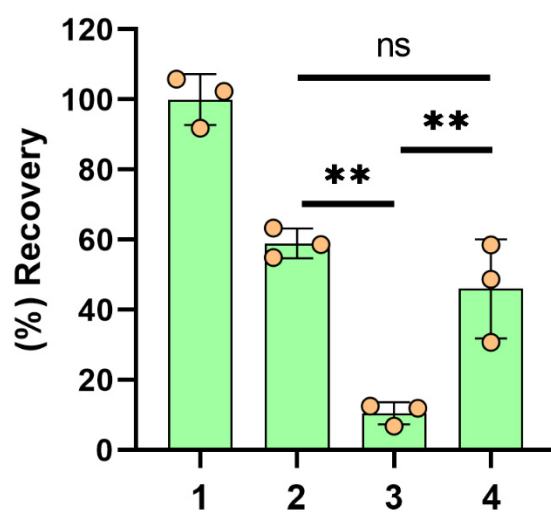

**Figure S2.** Recovery of HuNoV in the presence of heated clam tissue. Viral GEs in pre- or post-heated clam extracts were quantified by RT-qPCR and the recovery was calculated as in Materials and methods. \*\*  $p < 0.01$ , one-way ANOVA followed by Tukey's multiple-comparison test. ns; not significant ( $p > 0.05$ ). 1. Input; 2. Clam inoculated with HuNoV without heat treatment (0 min); 3. Clam inoculated with HuNoV followed by heat treatment (90 °C, 4 min); 4. Pre-heated (90°C, 4 min) clam inoculated with HuNoV.
